# Supplementary material
Source: PubMed Central journal article supplement (PMC6080127)
Supplement: Supp_Data.pdf [file Supp_Data.pdf]

## Supplementary Data

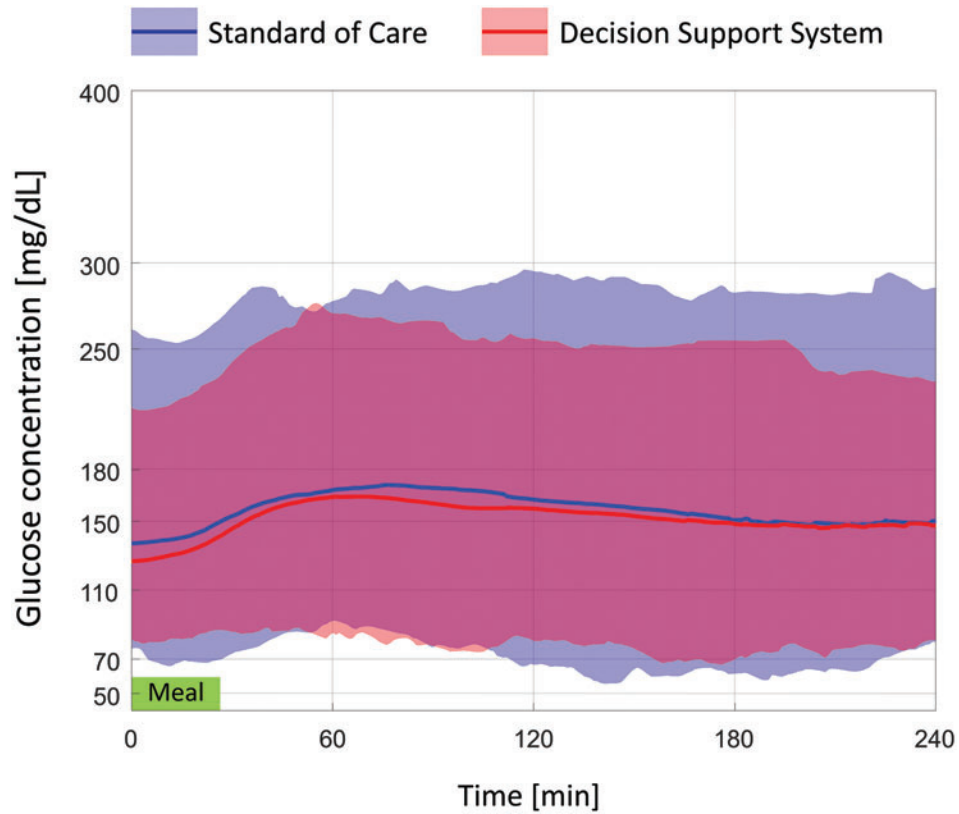

**SUPPLEMENTARY FIG. S1.** Glycemic average (line) and 90th quantile (shaded area) for SoC (blue) and DSS (red), after meals (breakfast is followed by exercise and is therefore not included). DSS, decision support system; SoC, standard of care.

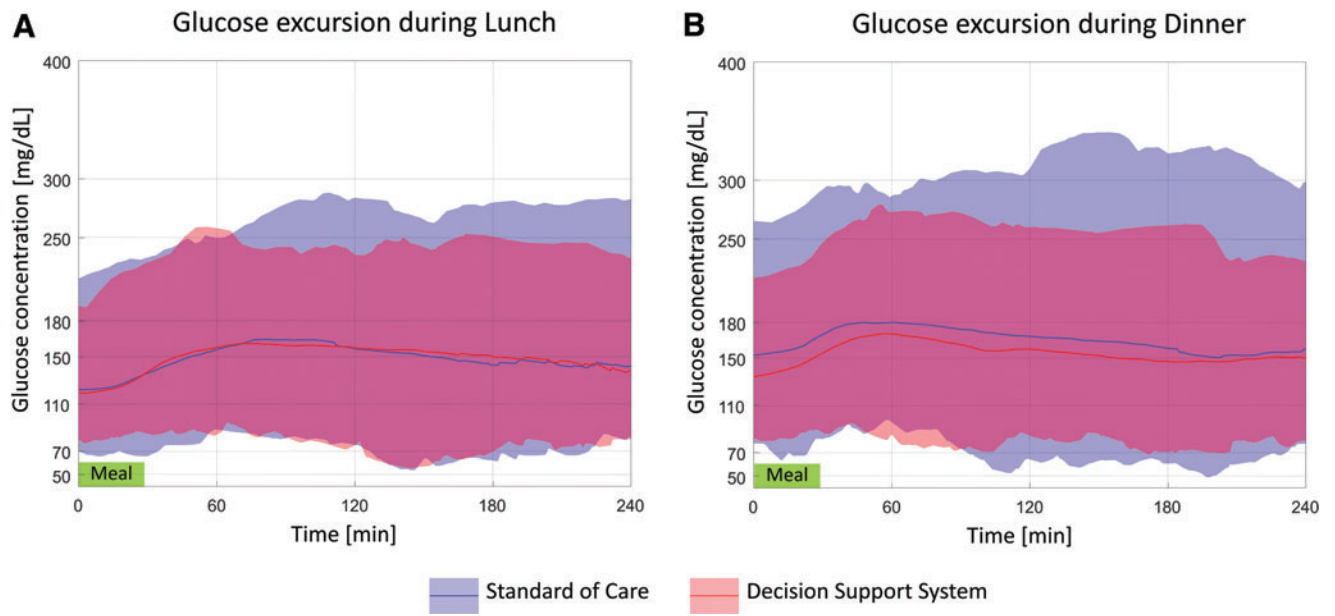

**SUPPLEMENTARY FIG. S2.** Glycemic average (line) and 90th quantile (shaded area) for SoC (blue) and DSS (red), after lunch (A) and dinner (B).

**A** Glucose excursion during meals with normal fat/protein

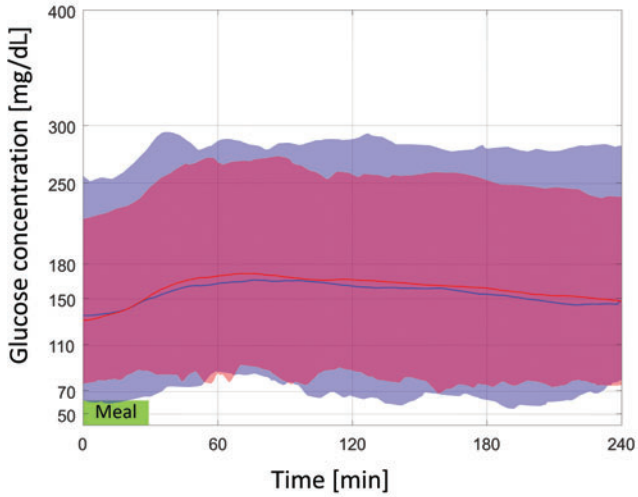

**B** Glucose excursion during meals with high fat/protein

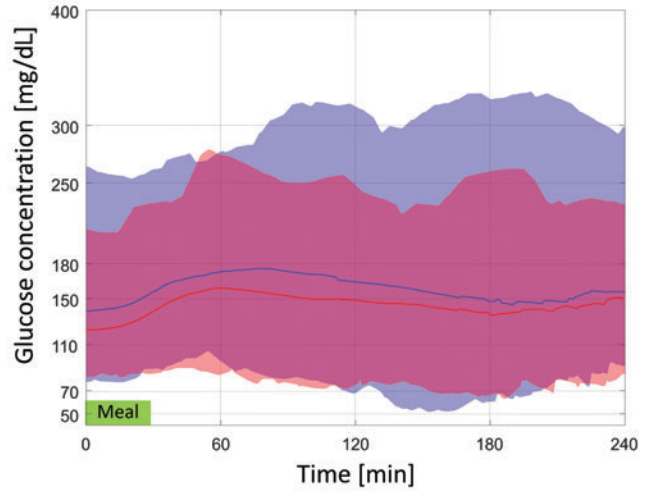

Standard of Care Decision Support System

**SUPPLEMENTARY FIG. S3.** Glycemic average (line) and 90th quantile (shaded area) for SoC (blue) and DSS (red), after meal with moderate (**A**) and high (**B**) levels of fats and proteins.
